# Supplementary material for: Mitigating the Adverse Effects of Semi-Arid Climate on Capsicum Cultivation by Using the Retractable Roof Production System
Source: MDPI journal article supplement (doi:10.3390/plants11202794), 2022-10-21
Supplement: s1 [file s1]

**Table S1.** Fertilizing program of the capsicum trial

| Fertilising program (kg ha <sup>-1</sup> ) |       |             |       |
|--------------------------------------------|-------|-------------|-------|
| Element                                    | Basal | Fertigation | Total |
| Nitrogen                                   | 30    | 193         | 223   |
| Phosphorus                                 | 97    | 44          | 141   |
| Potassium                                  | 166   | 137         | 303   |
| Magnesium                                  | 30    | 17          | 47    |
| Calcium                                    | 67    | 102         | 169   |
| Copper                                     | 0.11  | -           | 0.11  |
| Molybdenum                                 | 0.21  | -           | 0.21  |
| Manganese                                  | 0.4   | -           | 0.4   |
| Zinc                                       | 1.1   | -           | 1.1   |
